# Supplementary material for: Treatment Switching and Discontinuation Over 20 Years in the Big Multiple Sclerosis Data Network
Source: PubMed Central journal article supplement (PMC8010264; doi:10.3389/fneur.2021.647811), 2021-03-17
Supplement: Data_Sheet_1.pdf [file Data_Sheet_1.pdf]

## Observatoire Français de la Sclérose en Plaques (OFSEP) Co-investigators

| Surname                   | First Name | Qualification | Affiliation                                                                                                                                                                             |
|---------------------------|------------|---------------|-----------------------------------------------------------------------------------------------------------------------------------------------------------------------------------------|
| <b>Steering Committee</b> |            |               |                                                                                                                                                                                         |
| Casey                     | Romain     | PhD           | Observatoire français de la sclérose en plaques (OFSEP), Centre de coordination national, Lyon/Bron, France;                                                                            |
| Cotton                    | François   | MD            | Hospices civils de Lyon, Hôpital Lyon sud, Service d'imagerie médicale et interventionnelle, Lyon/Pierre-Bénite, France;                                                                |
| De Sèze                   | Jérôme     | MD            | Hôpitaux universitaire de Strasbourg, Hôpital de Hautepierre, Service des maladies inflammatoires du système nerveux – neurologie, Strasbourg, France;                                  |
| Douek                     | Pascal     | MD            | Union pour la lutte contre la sclérose en plaques (UNISEP), Ivry-sur-Seine, France;                                                                                                     |
| Guillemin                 | Francis    | MD            | CIC 1433 Epidémiologie Clinique, Centre hospitalier régional universitaire de Nancy, Inserm et Université de Lorraine, Nancy, France;                                                   |
| Laplaud                   | David      | MD            | Centre hospitalier universitaire de Nantes, Hôpital nord Laennec, Service de neurologie, Nantes/Saint-Herblain, France;                                                                 |
| Lebrun-Frenay             | Christine  | MD            | Centre hospitalier universitaire de Nice, Université Nice Côte d'Azur, Hôpital Pasteur, Service de neurologie, Nice, France;                                                            |
| Dion                      | Armelle    |               | Hospices civils de Lyon, Département de la recherche clinique et de l'innovation, Lyon, France;                                                                                         |
| Moreau                    | Thibault   | MD            | Centre hospitalier universitaire Dijon Bourgogne, Hôpital François Mitterrand, Service de neurologie, maladies inflammatoires du système nerveux et neurologie générale, Dijon, France; |
| Olaiz                     | Javier     | PhD           | Université Claude Bernard Lyon 1, Lyon ingénierie projets, Lyon, France;                                                                                                                |
| Pelletier                 | Jean       | MD            | Assistance publique des hôpitaux de Marseille, Centre hospitalier de la Timone, Service de neurologie et unité neuro-vasculaire, Marseille, France;                                     |
| Rigaud-Bully              | Claire     |               | Fondation Eugène Devic EDMUS contre la sclérose en plaques, Lyon, France;                                                                                                               |
| Stankoff                  | Bruno      | MD            | Assistance publique des hôpitaux de Paris, Hôpital Saint-Antoine, Service de neurologie, Paris, France                                                                                  |
| Vukusic                   | Sandra     | MD            | Hospices civils de Lyon, Hôpital Pierre Wertheimer, Service de neurologie A, Lyon/Bron, France                                                                                          |
| Zephir                    | Hélène     | MD            | Centre hospitalier universitaire de Lille, Hôpital Salengro, Service de neurologie, Lille, France                                                                                       |
| <b>Investigators</b>      |            |               |                                                                                                                                                                                         |
| Marignier                 | Romain     | MD            | Hospices civils de Lyon, Hôpital Pierre Wertheimer, Service de neurologie A, Lyon/Bron, France;                                                                                         |
| Debouverie                | Marc       | MD            | Centre hospitalier régional universitaire de Nancy, Hôpital central, Service de neurologie, Nancy, France;                                                                              |
| Edan                      | Gilles     | MD            | Centre hospitalier universitaire de Rennes, Hôpital Pontchaillou, Service de neurologie, Rennes, France;                                                                                |
| Ciron                     | Jonathan   | MD            | Centre hospitalier universitaire de Toulouse, Hôpital Purpan, Service de neurologie inflammatoire et neuro-oncologie, Toulouse, France;                                                 |

|             |            |    |                                                                                                                                                                                         |
|-------------|------------|----|-----------------------------------------------------------------------------------------------------------------------------------------------------------------------------------------|
| Ruet        | Aurélie    | MD | Centre hospitalier universitaire de Bordeaux, Hôpital Pellegrin, Service de neurologie, Bordeaux, France;                                                                               |
| Collongues  | Nicolas    | MD | Hôpitaux universitaire de Strasbourg, Hôpital de Hautepierre, Service des maladies inflammatoires du système nerveux – neurologie, Strasbourg, France;                                  |
| Lubetzki    | Catherine  | MD | Assistance publique des hôpitaux de Paris, Hôpital de la Pitié-Salpêtrière, Service de neurologie, Paris, France;                                                                       |
| Zephir      | Hélène     | MD | Centre hospitalier universitaire de Lille, Hôpital Salengro, Service de neurologie, Lille, France;                                                                                      |
| Labauge     | Pierre     | MD | Centre hospitalier universitaire de Montpellier, Hôpital Gui de Chauliac, Service de neurologie, Montpellier, France;                                                                   |
| Defer       | Gilles     | MD | Centre hospitalier universitaire de Caen Normandie, Service de neurologie, Hôpital Côte de Nacre, Caen, France;                                                                         |
| Cohen       | Mikaël     | MD | Centre hospitalier universitaire de Nice, Université Nice Côte d'Azur, Hôpital Pasteur, Service de neurologie, Nice, France;                                                            |
| Fromont     | Agnès      | MD | Centre hospitalier universitaire Dijon Bourgogne, Hôpital François Mitterrand, Service de neurologie, maladies inflammatoires du système nerveux et neurologie générale, Dijon, France; |
| Wiertelwsky | Sandrine   | MD | Centre hospitalier universitaire de Nantes, Hôpital nord Laennec, Service de neurologie, Nantes/Saint-Herblain, France;                                                                 |
| Berger      | Eric       | MD | Centre hospitalier régional universitaire de Besançon, Hôpital Jean Minjoz, Service de neurologie, Besançon, France;                                                                    |
| Clavelou    | Pierre     | MD | Centre hospitalier universitaire de Clermont-Ferrand, Hôpital Gabriel-Montpied, Service de neurologie, Clermont-Ferrand, France;                                                        |
| Audoin      | Bertrand   | MD | Assistance publique des hôpitaux de Marseille, Centre hospitalier de la Timone, Service de neurologie et unité neuro-vasculaire, Marseille, France;                                     |
| Giannesini  | Claire     | MD | Assistance publique des hôpitaux de Paris, Hôpital Saint-Antoine, Service de neurologie, Paris, France;                                                                                 |
| Gout        | Olivier    | MD | Fondation Adolphe de Rothschild de l'œil et du cerveau, Service de neurologie, Paris, France;                                                                                           |
| Thouvenot   | Eric       | MD | Centre hospitalier universitaire de Nîmes, Hôpital Carémeau, Service de neurologie, Nîmes, France;                                                                                      |
| Heinzlef    | Olivier    | MD | Centre hospitalier intercommunal de Poissy Saint-Germain-en-Laye, Service de neurologie, Poissy, France;                                                                                |
| Al-Khedr    | Abdullatif | MD | Centre hospitalier universitaire d'Amiens Picardie, Site sud, Service de neurologie, Amiens, France;                                                                                    |
| Bourre      | Bertrand   | MD | Centre hospitalier universitaire Rouen Normandie, Hôpital Charles-Nicolle, Service de neurologie, Rouen, France;                                                                        |
| Casez       | Olivier    | MD | Centre hospitalier universitaire Grenoble-Alpes, Site nord, Service de neurologie, Grenoble/La Tronche, France;                                                                         |
| Cabre       | Philippe   | MD | Centre hospitalier universitaire de Martinique, Hôpital Pierre Zobda-Quitman, Service de Neurologie, Fort-de-France, France;                                                            |
| Montcuquet  | Alexis     | MD | Centre hospitalier universitaire Limoges, Hôpital Dupuytren, Service de neurologie, Limoges, France;                                                                                    |

|              |               |    |                                                                                                                |
|--------------|---------------|----|----------------------------------------------------------------------------------------------------------------|
| Wahab        | Abir          | MD | Assistance publique des hôpitaux de Paris, Hôpital Henri Mondor, Service de neurologie, Créteil, France;       |
| Camdessanché | Jean-Philippe | MD | Centre hospitalier universitaire de Saint-Étienne, Hôpital Nord, Service de neurologie, Saint-Étienne, France; |
| Bakchine     | Serge         | MD | Centre hospitalier universitaire de Reims, Hôpital Maison-Blanche, Service de neurologie, Reims, France;       |
| Maurousset   | Aude          | MD | Centre hospitalier régional universitaire de Tours, Hôpital Bretonneau, Service de neurologie, Tours, France;  |
| Ben Nasr     | Haifa         | MD | Centre hospitalier sud francilien, Service de neurologie, Corbeil-Essonnes, France;                            |
| Hankiewicz   | Karolina      | MD | Centre hospitalier de Saint-Denis, Hôpital Casanova, Service de neurologie, Saint-Denis, France;               |
| Pottier      | Corinne       | MD | Centre hospitalier de Pontoise, Service de neurologie, Pontoise, France;                                       |
| Maubeuge     | Nicolas       | MD | Centre hospitalier universitaire de Poitiers, Site de la Milétrie, Service de neurologie, Poitiers, France;    |
| Labeyrie     | Céline        | MD | Assistance publique des hôpitaux de Paris, Hôpital Bicêtre, Service de neurologie, Le Kremlin-Bicêtre, France; |
| Nifle        | Chantal       | MD | Centre hospitalier de Versailles, Hôpital André-Mignot, Service de neurologie, Le Chesnay, France;             |
