# Supplementary material for: Treatment Switching and Discontinuation Over 20 Years in the Big Multiple Sclerosis Data Network
Source: PubMed Central journal article supplement (PMC8010264; doi:10.3389/fneur.2021.647811), 2021-03-17
Supplement: Data_Sheet_2.pdf [file Data_Sheet_2.pdf]

## MSBase Study Group Investigators

| Investigator                           | Affiliation                                                                        |
|----------------------------------------|------------------------------------------------------------------------------------|
| Eva Havrdova                           | General University Hospital                                                        |
| Serkan Ozakbas                         | Dokuz Eylul University                                                             |
| Vahid Shaygannejad                     | Al-Zahra Hospital, Isfahan University of Medical Sciences                          |
| Rana Karabudak                         | Hacettepe University                                                               |
| Raed Alroughani                        | Amiri Hospital                                                                     |
| Rocio Lopez Ruiz, Sara Eichau          | Hospital Universitario Virgen Macarena                                             |
| Cavit Boz                              | KTU Medical Faculty Farabi Hospital                                                |
| Murat Terzi                            | Mayis University, Medical Faculty                                                  |
| Pierre Duquette                        | CHUM - Hopital Notre Dame                                                          |
| Francois Grand Maison                  | Neuro Rive-Sud                                                                     |
| Pierre Grammond                        | Centre de réadaptation déficience physique Chaudière-Appalache                     |
| Ayse Altintas                          | Koc University School of Medicine                                                  |
| Allan Kermodé                          | Perron Institute for Neurological and Translational Science                        |
| Tomas Kalinck                          | The Royal Melbourne Hospital                                                       |
| Recai Turkoglu                         | Haydarpasa Numune Training and Research Hospital                                   |
| Aysun Soysal                           | Bakirkoy Education and Research Hospital for Psychiatric and Neurological Diseases |
| Katherine Buzzard & Olga Skabina       | Box Hill Hospital                                                                  |
| Jeannette Lechner Scott                | John Hunter Hospital                                                               |
| Seyed Aidin Sajedi                     | Golestan                                                                           |
| Yolanda Blanco                         | Hospital Clinic de Barcelona                                                       |
| Oliver Gerlach                         | Maaslandziekenhuis                                                                 |
| Vincent Van Pesch                      | Cliniques Universitaires Saint-Luc                                                 |
| Stella Hughes                          | Belfast HSC Trust                                                                  |
| Anneke Van der Walt                    | Alfred Health                                                                      |
| Celia Oreja-Guevara                    | Hospital Universitario La Paz                                                      |
| Christopher McGuigan                   | St Vincent's University Hospital                                                   |
| Michael Barnett                        | Brain and Mind Centre (BMRI)                                                       |
| Cristina Ramo                          | Hospital Germans Trias i Pujol                                                     |
| Jens Kuhle                             | Universitatsspital Basel                                                           |
| Riadh Gouider                          | Razi hospital                                                                      |
| Bhim Singhal                           | Bombay Hospital Institute of Medical Sciences                                      |
| Suzanne Hodgkinson                     | Liverpool Hospital                                                                 |
| Edgardo Cristiano & Juan Ignacio Rojas | Hospital Italiano                                                                  |
| Radek Ampapa                           | Nemocnice Jihlava                                                                  |
| Ernest Butler                          | Monash Medical Centre                                                              |
| Mark Slee                              | Flinders Medical Centre                                                            |
| Julie Prevost                          | CSSS Saint-Jérôme                                                                  |
| Bruce Taylor                           | Royal Hobart Hospital                                                              |
| Pamela McCombe                         | St Andrews Place                                                                   |
| Thor Petersen                          | Kommunehospitalet                                                                  |
| Koen de Gans                           | Groene Hart ziekenhuis                                                             |
| Erik Van Munster                       | Jeroen Bosch Ziekenhuis                                                            |
| Bart Van Wijmeersch                    | Rehabilitation and MS-Centre Overpelt                                              |

|                                   |                                                                     |
|-----------------------------------|---------------------------------------------------------------------|
| Guy Laureys                       | University Hospital Ghent                                           |
| LGF Sinnige                       | Medical Center Leeuwarden                                           |
| Richard Macdonell                 | Austin Health                                                       |
| Dheeraj Khurana                   | PGIMER                                                              |
| Ricardo Fernandes Bolanos         | Hospital Universitario Virgen de Valme                              |
| Jose Luis Sanchez Menoyo          | Hospital de Galdakao-Usansolo                                       |
| Maria Edite Rio                   | Hospital São João                                                   |
| Steve Vucic                       | Westmead Hospital                                                   |
| Jihad Inshasi                     | RASHID HOSPITAL                                                     |
| Tamara Castillo Trivino           | Hospital Donostia                                                   |
| Orla Gray                         | South East Trust                                                    |
| Jamie Campbell                    | Craigavon Area Hospital                                             |
| Pamela McCombe                    | Royal Brisbane and Women's Hospital                                 |
| Maria Laura Sladino               | Ineba                                                               |
| Talal Al-Harbi                    | King Fahad Specialist Hospital-Dammam                               |
| Dieter Poehlau                    | Multiple Sclerosis Centre Kamillus-Klinik                           |
| Ilya Kister                       | New York University School of Medicine                              |
| Leontien Den Braber-moerland      | Franciscus Ziekenhuis                                               |
| Yara Fragoso                      | Universidade Metropolitana de Santos                                |
| Cameron Shaw                      | Geelong Hospital                                                    |
| Norma Deri                        | Hospital Fernandez                                                  |
| Patrice Lalive                    | Geneva University Hospital                                          |
| Niel Shuey                        | St Vincents Hospital, Fitzroy                                       |
| Norbert Vella                     | Mater Dei Hospital                                                  |
| Walter Oleschko Arruda            | Hospital Ecoville                                                   |
| Angel Perez Sempere               | Hospital General Universitario de Alicante                          |
| Tunde Csepany                     | University of Debrecen                                              |
| Shlomo Fletcher                   | Assaf Harofeh Medical Center                                        |
| Fraser Moore                      | Jewish General Hospital                                             |
| John Parratt                      | Royal North Shore Hospital                                          |
| Danny Decoo                       | AZ Alma                                                             |
| Todd Hardy                        | Concord Repatriation General Hospital                               |
| Madgolna Simo                     | Semmelweis University Budapest                                      |
| Gabor Lovas                       | Jahn Ferenc Teaching Hospital                                       |
| Tatjana Petkovska-Boskova         | Clinic of Neurology Clinical Center                                 |
| Eli Skromne                       | Hospital Angeles de las Lomas. Instituto Mexicano de Neurociencias. |
| Donald McCarren                   | Thomas Jefferson University                                         |
| Jabir Alkhaboori                  | Royal Hospital                                                      |
| Jose Andres Dominiuez             | HOSPITAL UNIVERSITARIO DE LA RIBERA                                 |
| Karim Kotkata                     | Alexandria University Student Hospital                              |
| Joyce Pauline Joseph              | HOSPITAL KUALA LUMPUR                                               |
| Elizabeth Alejandra Bacile Bacile | Instituto de Neurociencias Cordoba                                  |
| Vetere Santiago                   | HIGA Gral. San Martin LaPlata                                       |
| Carlos Vrech                      | Sanatorio Allende                                                   |
| Kristina Kovacs                   | Péterfy Sandor Hospital                                             |
| Mike Boggild                      | The Townsville Hospital                                             |
| Ik Lin Tan                        | Macquarie University Hospital                                       |

|                                |                                                     |
|--------------------------------|-----------------------------------------------------|
| Alfredo Firstenfeld            | Clinica Modelo de Lanus                             |
| Piroska Imre                   | Veszprém Megyei Csolnoky Ferenc Kórház zrt.         |
| Jyh Yung                       | Penang General Hospital                             |
| Stephane Charest               | CHRTR                                               |
| Alejandro Jose Diaz Jimenez    | Instituto de Seguridad Social de Guatemala          |
| Lucienne Costa-Frossard Franca | RAMON Y CAJAL UNIVERSITY HOSPITAL                   |
| Carolyn Young                  | The Walton Centre for Neurology and Neurosurgery    |
| Tunde Erdelyi                  | Josa András Hospital                                |
| Attila Sas                     | BAZ County Hospital                                 |
| Eniko Dobos                    | Szent Imre Hospital                                 |
| Vladimir Bojkovski             | Clinical Centar-Neurology                           |
| Shereen Fathi                  | Maadi MS Center                                     |
| Cecilia Rajda                  | University of Szeged                                |
| Alejandro Caride               | HOSPITAL DE CLINICAS                                |
| Magda Tsolaki                  | G. Papanicolaou Hospital                            |
| Gabor Rum                      | Petz A. County Hospital                             |
| Anita Trauninger               | University of Pécs, Medical School                  |
| Karyn Boundy                   | Western Neurology                                   |
| Istvan Deme                    | Kaposi Mór Teaching Hospital                        |
| Carmen-Adella Sirbu            | Central Clinical Emergency Military Hosp.           |
| Benjamin Greenberg             | UT Southwestern                                     |
| Marcos Burgos                  | HOSPITAL SAN BERNARDO                               |
| Ulku Turk Boru                 | Dr Lutfi Kirdar Kartal Education and Research Hosp. |
| Kai Chen Wang                  | Cheng Hsin General Hospital, Taipei, Taiwan         |
| Pei Chiek The                  | Hospital Tuanku Ja'afar Seremban                    |
