# Supplementary material for: Treatment Switching and Discontinuation Over 20 Years in the Big Multiple Sclerosis Data Network
Source: PubMed Central journal article supplement (PMC8010264; doi:10.3389/fneur.2021.647811), 2021-03-17
Supplement: Data_Sheet_3.pdf [file Data_Sheet_3.pdf]

## Italian MS Registry Co-investigators

| Name                            | Affiliation                                                                                                                                                           |
|---------------------------------|-----------------------------------------------------------------------------------------------------------------------------------------------------------------------|
| <b>Francesco Passantino, MD</b> | Azienda Ospedaliera SS. Antonio e Biagio e Cesare Arrigo, Divisione Di Neurologia, Alessandria, Italia                                                                |
| <b>Maura Chiara Danni, MD</b>   | Ospedali Riuniti di Ancona, Centro SM - Clinica Neurologica, Ancona, Italia                                                                                           |
| <b>Susanna Cordera, MD</b>      | Ospedale Regionale della Valle D'Aosta, Struttura Complessa di Neurologia, Italia                                                                                     |
| <b>Gabriella Cacchio', MD</b>   | Ospedale C. e G. Mazzoni, Ambulatorio dedicato Sclerosi Multipla, UO Neurologia AV5, Ascoli Piceno, Italia                                                            |
| <b>Michele Ragno, MD</b>        | Ospedale Civile Madonna del Soccorso, Ambulatorio Sclerosi Multipla, UO di Neurologia AV5, San Benedetto del Tronto, Italia                                           |
| <b>Rocco Totaro, MD</b>         | Ospedale San Salvatore, Centro Malattie Demielinizzanti, Clinica Neurologica, L'Aquila, Italia                                                                        |
| <b>Sauro Severi, MD</b>         | Ambulatorio SM - Sezione Neurologia, Ospedale Valdarno, Montevarchi (AR), Italia                                                                                      |
| <b>Daniele Spitaleri, MD</b>    | AORN San G. Moscati Centro Sclerosi Multipla, U.O.C. Neurologia, Avellino, Italia                                                                                     |
| <b>Maurizia Gatto, MD</b>       | Ospedale Generale Regionale F. Miulli Centro Malattie Demielinizzanti, Bari, Italia                                                                                   |
| <b>Damiano Paolicelli, MD</b>   | Centro SM, Dipartimento di Scienze Mediche di Base, Neuroscienze ed Organi di Senso Università di Bari, Italia                                                        |
| <b>Bonaventura Ardito, MD</b>   | Ospedale Della Murgia Fabio Perinei, Centro Sclerosi Multipla, Altamura, Italia                                                                                       |
| <b>Valeria Barcella, MD</b>     | Ospedale Papa Giovanni XXIII, Centro Provinciale Sclerosi Multipla, USS Malattie Autoimmuni, Bergamo, Italia                                                          |
| <b>Lorenzo Capone, MD</b>       | MD, Ospedale degli Infermi, Centro Clinico delle Malattie Demielinizzanti dell'ASL di Biella, Biella, Italia                                                          |
| <b>Piero Nicolao, MD</b>        | Ospedale Di Feltre, Reparto Di Neurologia, ULSS 1 Dolomiti, Feltre, Italia                                                                                            |
| <b>Alessandra Lugaesi, MD</b>   | UOSI Riabilitazione Sclerosi Multipla IRCCS – ISNB, Bologna, Italia                                                                                                   |
| <b>Augusto Rini, MD</b>         | Ospedale A. Perrino, Centro Sclerosi Multipla, Brindisi, Italia                                                                                                       |
| <b>Vincenzo Sidoti, MD</b>      | Azienda Socio Sanitaria Territoriale (A.S.S.T.) della Franciacorta, Italia                                                                                            |
| <b>Marta Bianchi, MD</b>        | Ospedale Di Esine, Reparto di Neurologia, Esine, Italia                                                                                                               |
| <b>Imma Plasmati, MD</b>        | P.O. Dimiccoli, Centro SM c/o U.O. di Neurologia, Barletta, Italia                                                                                                    |
| <b>Eleonora Cocco, MD</b>       | P.O. Binaghi, Centro Regionale Per La Diagnosi E La Cura Della Sclerosi Multipla, Cagliari, Italia                                                                    |
| <b>Onofrj Marco, MD</b>         | MD, Università G. D'Annunzio, Policlinico SS Annunziata Clinica Neurologica, Chieti, Italia                                                                           |
| <b>Fiorella Mondino, MD</b>     | ASO S.Croce e Carle, Centro Sclerosi Multipla, SC Neurologia, Cuneo, Italia                                                                                           |
| <b>Alessia Di Sapia, MD</b>     | Ospedale Regina Montis Regalis, Centro SM, Mondovi, Italia                                                                                                            |
| <b>Raffaella Clerici, MD</b>    | Ospedale Generale di zona Valduce, Centro ad Alta Specializzazione per la diagnosi e la cura della sclerosi multipla, Como, Italia                                    |
| <b>Nerina Mascoli, MD</b>       | ASST Lariana Ospedale S. Anna, Centro SM UO Neurologia, Como, Italia                                                                                                  |
| <b>Maria Teresa Ferrò, MD</b>   | Ospedale Maggiore di Crema, Neuroimmunologia - Centro Provinciale per la diagnosi e terapia della Sclerosi Multipla, Crema, Italia                                    |
| <b>Roberto Bruno Bossio, MD</b> | ASP di Cosenza, U.O. di Neurologia, Centro SM, Cosenza, Italia                                                                                                        |
| <b>Francesco Patti, MD</b>      | AOL Policlinico Vittorio Emanuele - Università di Catania, Centro Sclerosi Multipla, Catania, Italia                                                                  |
| <b>Davide Maimone, MD</b>       | Ospedale Garibaldi, Centro Sclerosi Multipla, Nesima, Italia                                                                                                          |
| <b>Paola Valentino, MD</b>      | Policlinico Universitario- Campus Germaneto, Centro Sclerosi Multipla, Catanzaro, Italia                                                                              |
| <b>Silvia Strumia, MD</b>       | Ambulatorio Sclerosi Multipla della U.O. di Neurologia, AUSL della Romagna, Forli, Italia                                                                             |
| <b>Maura Pugliatti, MD</b>      | Centro Di Servizio E Ricerca Sulla Sclerosi Multipla AOU Di Ferrara, Italia                                                                                           |
| <b>Luisa Maria Caniatti, MD</b> | Azienda ospedale università S. Anna di Ferrara - Cona Ferrara, U.O.di Neurologia, Ferrara, Italia                                                                     |
| <b>Carlo Avolio, MD</b>         | Centro Interdipartimentale Malattie Demielinizzanti - AOU Ospedali Riuniti Di Foggia, Italia                                                                          |
| <b>Paola Crociani, MD</b>       | IRCCS Casa Sollievo Della Sofferenza, Centro SM, SC Neurologia, S. Giovanni Rotondo, Italia                                                                           |
| <b>Maria Pia Amato, MD</b>      | Dipartimento NEUROFARBA Sezione Neuroscienze, Università Degli Studi Di Firenze, Centro SM Neurologia 1, AOU Careggi, Firenze, Italia                                 |
| <b>Luca Massacesi, MD</b>       | Centro di riferimento regionale per il trattamento della sclerosi multipla, SOD Neurologia II, AOU Careggi, Dipartimento Neuroscienze - Università di Firenze, Italia |
| <b>Susanna Malagù, MD</b>       | Ospedale Bufalini, Centro Sclerosi Multipla, U.O. di Neurologia, Cesena, Italia                                                                                       |

|                                      |                                                                                                                                                                                                                                                                      |
|--------------------------------------|----------------------------------------------------------------------------------------------------------------------------------------------------------------------------------------------------------------------------------------------------------------------|
| <b>Giuseppe Ribizzi, MD</b>          | MD, Ospedale Policlinico San Martino, U.O. Neurologia, Dipartimento Di Neuroscienze E Organi Di Senso, Genova, Italia                                                                                                                                                |
| <b>Matilde Inglese, MD</b>           | Ospedale Policlinico San Martino (DiNOGMI), Centro Per Lo Studio E La Cura Della Sclerosi Multipla E Malattie Demyelinizzanti - Dipartimento Di Neuroscienze, Riabilitazione, Oftalmologia, Genetica E Scienze MaternoInfantili, Clinica Neurologica, Genova, Italia |
| <b>Simonetta Venturi, MD</b>         | E.O. Ospedale Galliera, Ambulatorio Sclerosi Multipla, Genova, Italia                                                                                                                                                                                                |
| <b>Paola Gazzola, MD</b>             | SC Neurologia, Ospedale P. Antero Micone, Ambulatorio Sclerosi Multipla - Neurologia ASL 4 Chiavarese, Genova, Italia                                                                                                                                                |
| <b>Giampaolo Brichetto, MD</b>       | Servizio di Riabilitazione AISM Liguria, Italia                                                                                                                                                                                                                      |
| <b>Roberto Marconi, MD</b>           | Ospedale Misericordia, U.O. Neurologia, Grosseto, Italia                                                                                                                                                                                                             |
| <b>Paolo Bellantonio, MD</b>         | Centro Sclerosi Multipla - IRCCS Neuromed, Pozzilli, Italia                                                                                                                                                                                                          |
| <b>Roberto Balgera, MD</b>           | MD, Azienda Ospedaliera A. Manzoni, Centro Sclerosi Multipla, Divisione di Neurologia, Lecco, Italia                                                                                                                                                                 |
| <b>Francesca De Robertis, MD</b>     | Ospedale Vito Fazzi, Divisione di Neurologia, Lecce, Italia                                                                                                                                                                                                          |
| <b>Silvia Fermi, MD</b>              | Ospedale Maggiore di Lodi, Div. Neurologia, Lodi, Italia                                                                                                                                                                                                             |
| <b>Franco Fausto, MD</b>             | Ospedale della Versilia, Ambulatorio Sclerosi Multipla, Italia                                                                                                                                                                                                       |
| <b>Monica Mazzoni, MD</b>            | Ospedale San Luca, Centro Malattie Disimmuni Del SNC E SNP, Lucca, Italia                                                                                                                                                                                            |
| <b>Giuseppe Meucci, MD</b>           | Spedali Riuniti di Livorno, Ambulatorio Sclerosi Multipla, Unità Operativa di Neurologia e Neurofisiopatologia, Livorno, Italia                                                                                                                                      |
| <b>Maria Gabriella Coniglio, MD</b>  | P.O. Madonna delle Grazie, Centro Sclerosi Multipla, Matera, Italia                                                                                                                                                                                                  |
| <b>Guido Cavaletti, MD</b>           | Centro Di Neuroimmunologia, Ospedale S. Gerardo, Monza, Italia                                                                                                                                                                                                       |
| <b>Elisabetta Cartechini, MD</b>     | Ospedale di Macerata, Centro Sclerosi Multipla - c/o UOC Neurologia, Macerata, Italia                                                                                                                                                                                |
| <b>Maria Buccafusca, MD</b>          | A.O.U. Policlinico Martino, Centro Sclerosi Multipla, Messina, Italia                                                                                                                                                                                                |
| <b>Placido Bramanti, MD</b>          | IRCCS Centro Neurolesi Bonino Pulejo, Messina, Italia                                                                                                                                                                                                                |
| <b>Massimo Filippi, MD</b>           | Ospedale San Raffaele, Centro Sclerosi Multipla, Milano, Italia                                                                                                                                                                                                      |
| <b>Marco Rovaris, MD</b>             | IRCCS Fondazione Don Carlo Gnocchi, Centro SM, Italia                                                                                                                                                                                                                |
| <b>Marco Ronzoni, MD</b>             | ASST-Rhodense, Garbagnate Milanese, Centro SM, Italia                                                                                                                                                                                                                |
| <b>Valentina Torri Clerici, MD</b>   | Fondazione IRCCS Istituto Neurologico Carlo Besta, Centro Sclerosi Multipla, Milano, Italia                                                                                                                                                                          |
| <b>Luca Chiveri, MD</b>              | ASST Ovest Milanese, Centro SM, Dipartimento Di Neuroscienze, Legnano, Italia                                                                                                                                                                                        |
| <b>Pierluigi Bertora, MD</b>         | ASST FBF SACCO P.O. L. Sacco, Centro Sclerosi Multipla, UO Neurologia, Milano, Italia                                                                                                                                                                                |
| <b>Simone Tonietti, MD</b>           | Ospedale S. Carlo Borromeo, Centro Sclerosi Multipla - UOC Neurologia, Milano, Italia                                                                                                                                                                                |
| <b>Elio Scarpini, MD</b>             | Ospedale Policlinico, Università Di Milano, Centro SM, U.O. Mal. Neurodegenerative E Demyelinizzanti, Milano, Italia                                                                                                                                                 |
| <b>Alessandra Protti, MD</b>         | ASST Grande Ospedale Metropolitano Niguarda, Milano, Italia                                                                                                                                                                                                          |
| <b>Patrizia Sola, MD</b>             | Azienda Ospedaliero-Universitaria/OCSAE, UO Neurologia, Centro Malattie Demyelinizzanti, Dipartimento Di Neuroscienze, Università di Modena E Reggio Emilia, Modena, Italia                                                                                          |
| <b>Diana Ferraro, MD</b>             | Azienda Ospedaliera Universitaria, Modena, Italy                                                                                                                                                                                                                     |
| <b>Mario Santangelo, MD</b>          | Ospedale Di Carpi, U.O. C. Di Neurologia, Modena, Italia                                                                                                                                                                                                             |
| <b>Carlo Maremmani, MD</b>           | Civico Ospedale di Carrara, Centro Sclerosi Multipla, Divisione Neurologica, Carrara, Italia                                                                                                                                                                         |
| <b>Giacomo Lus, MD</b>               | Centro Clinico per la Sclerosi Multipla, II Clinica Neurologica, II Università di Napoli, Italia                                                                                                                                                                     |
| <b>Antonio Gallo, MD</b>             | Università Degli Studi Della Campania 'Luigi Vanvitelli', I Clinica Neurologica, Napoli, Italia                                                                                                                                                                      |
| <b>Giorgia Teresa Maniscalco, MD</b> | Ospedale A. Cardarelli, Centro regionale SM, Napoli, Italia                                                                                                                                                                                                          |
| <b>Vincenzo Brescia Morra, MD</b>    | AOU Policlinico Federico II, Centro Regionale Sclerosi Multipla, Unità Operativa Semplice Neurologia, Napoli, Italia                                                                                                                                                 |
| <b>Giuseppe Orefice, MD</b>          | AOU Policlinico Federico II, Centro Provinciale Sclerosi Multipla, Napoli, Italia                                                                                                                                                                                    |
| <b>Leonardo Sinisi, MD</b>           | Ospedale San Paolo, Centro SM, UOC Di Neurologia, Napoli, Italia                                                                                                                                                                                                     |
| <b>Cristoforo Comi, MD</b>           | AOU Maggiore della Carità, Centro Sclerosi Multipla, Clinica Neurologica, Università Piemonte Orientale, Novara, Italia                                                                                                                                              |
| <b>Maria Luisa Piras, MD</b>         | Ospedale S. Francesco - Centro diagnosi, cura e ricerca per Sclerosi Multipla, Nuoro, Italia                                                                                                                                                                         |
| <b>Giuseppe Salemi, MD</b>           | Centro Per La Diagnosi E Cura Della SM E Delle Malattie Demyelinizzanti - Dipartimento Emergenza, Urgenza E Neuroscienze, Università Di Palermo, Palermo, Italia                                                                                                     |
| <b>Salvatore Cottone, MD</b>         | Centro Di Riferimento Regionale Per La Malattie Neuroimmunologiche Dell'A.O.O.R. Villa Sofia-Cervello, Palermo, Italia                                                                                                                                               |

|                                   |                                                                                                                                                                          |
|-----------------------------------|--------------------------------------------------------------------------------------------------------------------------------------------------------------------------|
| <b>Luigi M. E. Grimaldi, MD</b>   | Fondazione Istituto G. Giglio - Centro SM, Cefalù, Italia                                                                                                                |
| <b>Giuseppe Santangelo, MD</b>    | Ospedale Pediatrico G. di Cristina, Centro regionale Sclerosi Multipla in età evolutiva, Palermo, Italia                                                                 |
| <b>Paolo Gallo, MD</b>            | Azienda Ospedaliera-Università degli Studi Di Padova, Centro Specializzato Regionale per la Sclerosi Multipla (CeSMuV), Dipartimento Di Neuroscienze DNS, Padova, Italia |
| <b>Francesco D'Andrea, MD</b>     | Casa Di Cura Villa Serena, Centro SM, UO Neurologia, Pescara, Italia                                                                                                     |
| <b>Francesco Corea, MD</b>        | Ospedale San Giovanni Battista, Ambulatorio malattie infiammatorie demielinizzanti, Foligno, Italia                                                                      |
| <b>Paola Sarchielli, MD</b>       | Ospedale S. Maria della Misericordia, Centro Malattie Demielinizzanti, Perugia, Italia                                                                                   |
| <b>Maria Grazia Celani, MD</b>    | Servizio Per Le Malattie Demielinizzanti, SC Di Neurofisiopatologia-Azienda Ospedaliera Di Perugia, Italia                                                               |
| <b>Cristina Frittelli, MD</b>     | Ospedale Lotti, Ambulatorio Malattie Demielinizzanti, UOC Neurologia, Pontedera, Italia                                                                                  |
| <b>Livia Pasquali, MD</b>         | Centro Malattie Demielinizzanti UO Neurologia, Dipartimento Di Medicina Clinica E Sperimentale, Università Di Pisa, Italia                                               |
| <b>Mario Falcini, MD</b>          | Ospedale di Prato, Centro per la Sclerosi Multipla, Unità Operativa di Neurologia, Prato, Italia                                                                         |
| <b>Franco Granella, MD</b>        | Centro Sclerosi Multipla, Azienda Ospedaliero-Universitaria di Parma, Italia                                                                                             |
| <b>Ilaria Pesci, MD</b>           | Ospedale Di Vaio, Centro SM, UO Neurologia, Fidenza, Italia                                                                                                              |
| <b>Roberto Bergamaschi, MD</b>    | S.S. Sclerosi Multipla dell'IRCCS Fondazione Istituto Neurologico Nazionale C. Mondino, Pavia, Italia                                                                    |
| <b>Diomira Acquistapace, MD</b>   | Azienda Ospedaliera Regionale S. Carlo, Centro Sclerosi Multipla, Potenza, Italia                                                                                        |
| <b>Umberto Aguglia, MD</b>        | Grande Ospedale Metropolitano Bianchi Melacrinò Morelli, Ambulatorio Sclerosi Multipla, Reggio Calabria, Italia                                                          |
| <b>Sara Montepietra, MD</b>       | U.O.C. Neurologia, Ospedaliera Santa Maria Nuova, Centro SM, Reggio Emilia, Italia                                                                                       |
| <b>Antonello Giordano, MD</b>     | P.O. R. Guzzardi, S.C. Provinciale di Neurologia, ASP Ragusa, Italia                                                                                                     |
| <b>Mario Di Napoli, MD</b>        | Ospedale San Camillo De Lellis, Centro Sclerosi Multipla, U.O. di Neurologia, Rieti, Italia                                                                              |
| <b>Marco Salvetti, MD</b>         | CENTERS Centro Neurologico Terapie Sperimentali, Sapienza Università Di Roma, Azienda Ospedaliera S. Andrea, Roma, Italia                                                |
| <b>Carlo Pozzilli, MD</b>         | Policlinico S. Andrea, Centro SM, Università Sapienza Roma, Italia                                                                                                       |
| <b>Massimiliano Mirabella, MD</b> | Fondazione Policlinico Universitario A. Gemelli IRCCS, UO Sclerosi Multipla, Università Cattolica Del Sacro Cuore, Roma, Italia                                          |
| <b>Antonella Conte, MD</b>        | Policlinico Umberto I, Università Sapienza Roma, Italia                                                                                                                  |
| <b>Claudio Gasperini, MD</b>      | Azienda Osp. S. Camillo Forlanini, Centro Sclerosi Multipla, Roma, Italia                                                                                                |
| <b>Marco Peresson, MD</b>         | Ospedale Fatebenefratelli San Pietro, Centro Clinico Sclerosi Multipla, Roma, Italia                                                                                     |
| <b>Maria Grazia Grasso, MD</b>    | Fondazione S. Lucia, Centro Sclerosi Multipla, Roma, Italia                                                                                                              |
| <b>Elisabetta Ferraro, MD</b>     | PO San Filippo Neri - ASL Roma I, Roma, Italia                                                                                                                           |
| <b>Vincenzo Di Lazzaro, MD</b>    | Policlinico Universitario Campus Bio-Medico, Centro SM, UOC Di Neurologia, Roma, Italia                                                                                  |
| <b>Girolama Marfia, MD</b>        | Policlinico Università di Roma Tor Vergata, UOSB Centro di Riferimento Regionale per la Sclerosi Multipla, Roma, Italia                                                  |
| <b>Daniela de Pascalis, MD</b>    | Ospedale S. Eugenio, Centro regionale per la diagnosi e cura della Sclerosi Multipla e malattie demielinizzanti, Roma, Italia                                            |
| <b>Carlo Piantadosi, MD</b>       | Az. Ospedaliera S. Giovanni-Addolorata, Centro Sclerosi Multipla, Roma, Italia                                                                                           |
| <b>Massimiliano Valeriani, MD</b> | Ospedale Bambino Gesù, Centro per la diagnosi e la cura delle malattie infiammatorie demielinizzanti in età pediatrica, Roma, Italia                                     |
| <b>Vincenzo Busillo, MD</b>       | Ospedale Maria SS. Addolorata - Centro Diagnosi e Terapia Sclerosi Multipla, Salerno, Italia                                                                             |
| <b>Paolo Barone, MD</b>           | Azienda Ospedaliera San Giovanni di Dio e Ruggi d'Aragona, Divisione Neurologica, Salerno, Italia                                                                        |
| <b>Monica Ulivelli, MD</b>        | UOS Neuroimmunologia clinica, Ambulatorio Sclerosi multipla AOUS, Siena, Italia                                                                                          |
| <b>Nicola De Stefano, MD</b>      | Azienda Ospedaliera Universitaria Senese, Ambulatorio Sclerosi multipla - U.O.S.A. Malattie Neurodegenerative e Demielinizzanti, Siena, Italia                           |
| <b>Giuseppe Santuccio, MD</b>     | Azienda Socio Sanitaria Territoriale (ASST) della Valtellina e Alto Lario, reparto di Neurologia, Sedi di Sondrio e Sondalo, Italia                                      |
| <b>Sergio Parodi, MD</b>          | Ospedale Civile S. Andrea, Centro Sclerosi Multipla e Malattie Demielinizzanti, La Spezia, Italia                                                                        |
| <b>Antonio Cappellani, MD</b>     | Ambulatorio di Neurologia, Centro Sclerosi Multipla, Ex Ospedale Neuropsichiatrico, Siracusa, Italia                                                                     |

|                                  |                                                                                                                                                |
|----------------------------------|------------------------------------------------------------------------------------------------------------------------------------------------|
| <b>Sebastiano Traccis, MD</b>    | Presidio Ospedaliero di Ozieri, Centro Prescrittore Sclerosi Multipla, U.O. di Neurologia, Sassari, Italia                                     |
| <b>Roberto Zarbo, MD</b>         | Azienda Ospedaliero-Universitaria Di Sassari, Centro Per La Diagnosi E Cura Della SM, Sassari, Italia                                          |
| <b>Tiziana Tassinari, MD</b>     | Ospedale Santa Corona, Centro SM, S.C. Neurologia, Pietra Ligure, Italia                                                                       |
| <b>Fabio Bandini, MD</b>         | Ospedale S. Paolo, Divisione di Neurologia, Savona, Italia                                                                                     |
| <b>Annamaria Marson, MD</b>      | Ospedale Civile, Neurologia BC Chivasso-Ivrea, Italia                                                                                          |
| <b>Paola Cavalla, MD</b>         | Città Della Salute E Della Scienza Di Torino, Centro SM, Neurologia 1 D.U., Torino, Italia                                                     |
| <b>Marinella Clerico, MD</b>     | Azienda Ospedaliero Universitaria San Luigi Gonzaga, S.C.D.U. di Neurologia 1, Orbassano, Italia                                               |
| <b>Giulia De Rosa, MD</b>        | Ospedale Civile, Centro Sclerosi Multipla, Divisione Di Neurologia, Ivrea, Italia                                                              |
| <b>Antonio Bertolotto, MD</b>    | AOU San Luigi, Centro Di Riferimento Regionale Per La SM (CRESM), SCDO Neurologia, Orbassano, Italia                                           |
| <b>Daniele Imperiale, MD</b>     | Ospedale Maria Vittoria, Centro Sclerosi Multipla, Divisione di Neurologia, Torino, Italia                                                     |
| <b>Marika Vianello, MD</b>       | Ospedale Regionale Cà Fancello, Centro Sclerosi Multipla UO, UO Neurologia, Treviso, Italia                                                    |
| <b>Bruno Marini, MD</b>          | Ospedale S. Giacomo Apostolo, U.O.C. Neurologia, ULSS2- Marca Trevigiana-Regione Veneto, Castelfranco Veneto, Italia                           |
| <b>Marianna Fortunato, MD</b>    | Ospedale Civile di Conegliano Veneto, Ambulatorio Malattie Demielinizzanti, Unità Operativa Complessa di Neurologia, Conegliano Veneto, Italia |
| <b>Daniela Cargnelutti, MD</b>   | ASUIUD P.O. S. Maria Della Misericordia, SOC Neurologia - Day Hospital, Udine, Italia                                                          |
| <b>Mauro Zaffaroni, MD</b>       | Ospedale Di Gallarate, Centro Sclerosi Multipla, ASST Della Valle Olona, Gallarate, Italia                                                     |
| <b>Davide Nasuelli, MD</b>       | Presidio Ospedaliero Di Saronno ASST Della Valle Olona Ambulatorio Sclerosi Multipla, Saronno, Italia                                          |
| <b>Paola Banfi, MD</b>           | Ospedale di Circolo e Fondazione Macchi, Centro Sclerosi Multipla, Ambulatorio Malattie Demielinizzanti, Varese, Italia                        |
| <b>Andrea Mauro Brioschi, MD</b> | Istituto Auxologico Italiano IRCCS, Istituto Scientifico Ospedale S. Giuseppe e Ambulatorio, Milano, Italia                                    |
| <b>Rocco Quatrate, MD</b>        | Ospedale dell'Angelo, Ambulatorio Sclerosi Multipla, Divisione di Neurologia, Venezia, Italia                                                  |
| <b>Roberto Bombardi, MD</b>      | Ospedale Nuovo, Ambulatorio malattie demielinizzanti del SNC, Unità Operativa Complessa di Neurologia, Conegliano, Italia                      |
| <b>Alberto Gajofatto, MD</b>     | Policlinico G.B. Rossi, Clinica Neurologica, Dipartimento di Neuroscienze, Biomedicina e Movimento, Verona, Italia                             |
| <b>Paolo Giannetti, MD</b>       | Ospedale Belcolle, Centro Sclerosi Multipla, Viterbo, Italia                                                                                   |
| <b>Claudio Solaro, MD</b>        | Casa Di Cura Mons. Luigi Novarese, Dip. Di Riabilitazione, Moncrivello VC, Italia                                                              |
